# Supplementary material for: Influence of synoptic patterns on surface ozone variability over the eastern United States from 1980 to 2012
Source: Copernicus journal article supplement (doi:10.5194/acp-15-10925-2015), 2015-10-01
Supplement: Supplementary file 1 [file acp-15-10925-2015-supplement.pdf]

Supplement of Atmos. Chem. Phys., 15, 10925–10938, 2015  
<http://www.atmos-chem-phys.net/15/10925/2015/>  
doi:10.5194/acp-15-10925-2015-supplement  
© Author(s) 2015. CC Attribution 3.0 License.

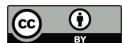

*Supplement of*

## **Influence of synoptic patterns on surface ozone variability over the eastern United States from 1980 to 2012**

**L. Shen et al.**

*Correspondence to:* L. Shen (lshen@fas.harvard.edu)

The copyright of individual parts of the supplement might differ from the CC-BY 3.0 licence.

1 **1 Spatial patterns of temporal variability in daily JJA surface ozone in the eastern**  
2 **United States in different site types**

3 Here we examine whether the bimodal structure of observed ozone variability is sensitive to the  
4 type of EPA-AQS site (rural, suburban, and urban). Fig. S1 shows the zonally averaged ozone  
5 concentrations, standard deviation (SD), and relative SD for the three site types across the  
6 eastern United States for different time intervals. As in Fig. 1, we include in our analysis all sites  
7 reporting at least one observation every summer during 1980-2012, resulting in 787 rural, 617  
8 suburban, and 266 urban sites altogether. Zonally averaged ozone concentrations at all site types  
9 reveal a unimodal structure peaking around 35°N-40°N for all time spans, with an overall trend  
10 of decreasing concentrations from 1980 to present. The absolute ozone SD shows a bimodal  
11 structure for all time spans at rural sites, with peaks at 29°-35°N and 39°-43°N. At urban and  
12 suburban sites, the northern peak in absolute SD diminishes over time, while the southern peak  
13 persists, consistent with the more rapid NO<sub>x</sub> reductions in the North (Russell et al., 2012). In  
14 contrast, the relative ozone SD shows a clear bimodal structure for all three site types and all  
15 time intervals. Our finding that the bimodal structure is a robust feature in both the absolute and  
16 relative ozone SD at rural sites thus reflects the smaller influence of anthropogenic emissions at  
17 such sites. In calculating the relative SD, we remove much of the influence of anthropogenic  
18 emissions. The persistent bimodal structure of the relative SD in ozone across time and sites  
19 therefore gives us confidence that the relative SD can be used to identify those regions where  
20 meteorology plays a large role in driving ozone variability.

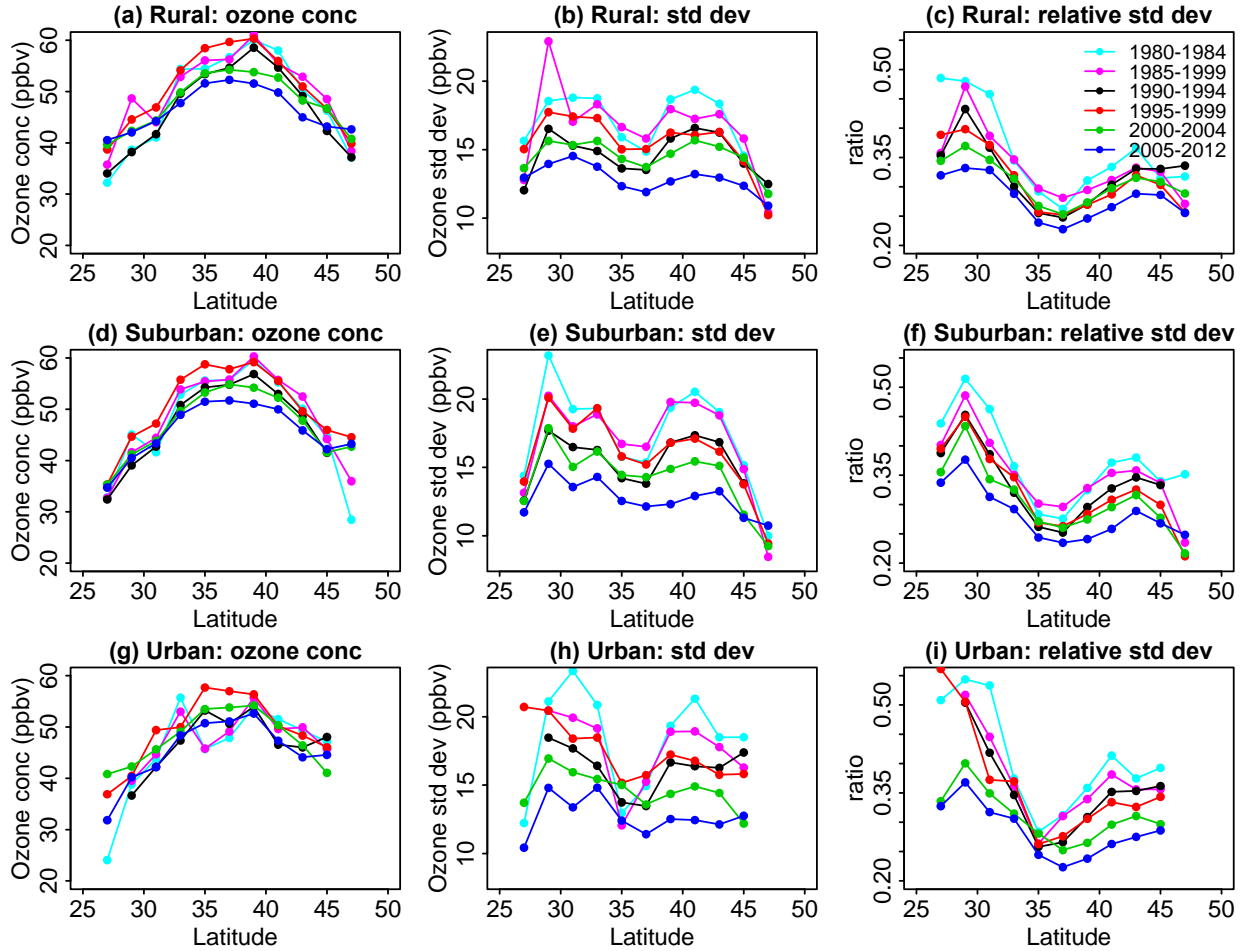

1  
 2 **Figure S1.** Latitudinal variation of zonal mean ozone concentrations (a, d, g), ozone standard  
 3 deviation (b, e, h), and relative standard deviation (c, f, i). All values are for JJA mean MDA8  
 4 ozone. The top row shows results from rural sites, the middle from suburban sites, and the  
 5 bottom from urban sites in AQS. Data have been averaged between  $100^{\circ}\text{W}$  and  $65^{\circ}\text{W}$  longitude  
 6 and binned to  $2^{\circ}$  intervals in latitude. The different colors denote different 5-year time intervals,  
 7 except for the most recent interval, which is 8 years in length.

## 8 **2 Correlation of ozone and Great Plains low level jet (GPLLJ)**

9 Here we seek to examine more closely the causes for the pattern in the third empirical orthogonal  
 10 function (EOF3) of daily JJA maximum daily 8-hour average (MDA8) ozone over the eastern  
 11 United States. To that end, we calculate the correlation of JJA MDA8 ozone and the GPLLJ  
 12 wind speed, which we define as the daily mean meridional wind speed at 850 hPa averaged over  
 13 a  $10^{\circ}\times 5^{\circ}$  box in the southern part of the Great Plains ( $26.25^{\circ}\text{-}36.25^{\circ}\text{N}$ ,  $101.25^{\circ}\text{-}96.25^{\circ}\text{W}$ ) as  
 14 indicated by the red rectangle in Fig. S2. This region corresponds to the core of the GPLLJ (Zhu

1 and Liang, 2013). We follow the approach of Zhu and Liang (2013) but use daily data instead of  
2 monthly data since our focus is on the daily variability. Figure S2 shows the relationship of daily  
3 detrended and deseasonalized MDA8 ozone concentration and the GPLLJ wind speed, with  
4 negative correlations in the South Central and positive correlations in the Great Lakes and East  
5 coast regions. Our result is similar to that of Zhu and Liang (2013) but with much lower  
6 correlations due to the finer temporal resolution. The figure shows that a strong GPLLJ ventilates  
7 Texas and the central United States, but is associated with slightly increased ozone in the  
8 Northeast and Southeast.

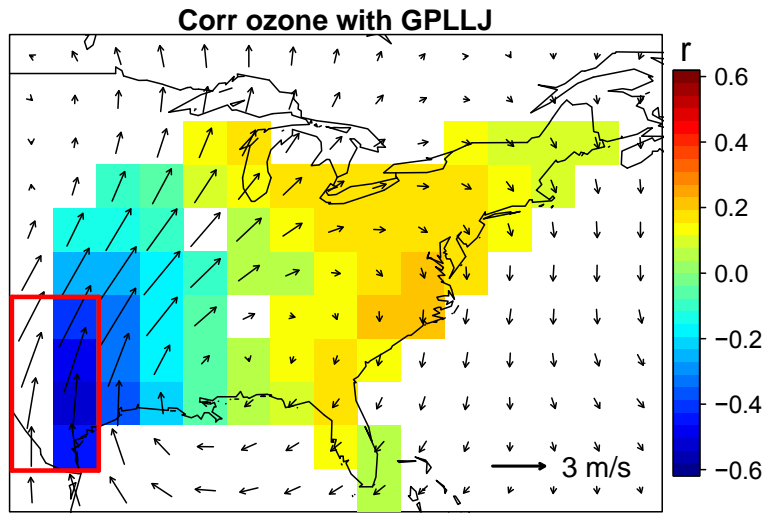

9  
10 Figure S2. Correlations (in color) of the 1980-2012 timeseries of daily JJA MDA8 ozone  
11 anomalies across the United States and the daily meridional wind speeds at 850 hPa averaged  
12 over the region indicated by the red rectangle. Ozone values have been detrended and  
13 deseasonalized. Black arrows denote the composite 850 hPa wind anomalies on days when the  
14 meridional windspeed within the red rectangle is greater than the JJA median GPLLJ over this  
15 time period ( $6.4 \text{ m s}^{-1}$ ).

### 16 **3 Use of empirical orthogonal functions to diagnose drivers of seasonal JJA ozone** 17 **variability**

18 We repeat the EOF analysis using the timeseries of 1980-2012 JJA mean ozone fields, instead of  
19 daily mean fields. In using daily data, the first three EOFs explain just 53% of the total variance  
20 in ozone; here we find that using seasonal mean data can explain 75% of the total variance. This  
21 is because the averaging process from daily to seasonal data can smooth noisy data. Figure S3  
22 shows the results of this EOF analysis and the correlations of the PCs with different

1 meteorological variables. The top three EOF patterns are similar to those we derive using daily  
2 mean ozone (Fig. 3), but with one slight difference, as detailed below. We first describe the  
3 similarities between the two EOF analyses. Like EOF1 derived from daily ozone data (Fig. 3a),  
4 EOF1 here is linked to the north-south movement of the polar jet (Fig. S3a-3c) and explains 48%  
5 of the total variance in seasonal JJA ozone. The next two EOFs derived from seasonal data are  
6 similar to the next two derived from daily data, but with the order reversed. Like EOF3 with  
7 daily ozone data (Fig. 3g), EOF2 here exhibits an east-west pattern characteristic of a westward  
8 extension of Bermuda High and an enhanced GPLLJ (Fig. S3d-3f). This EOF explains 15% of  
9 the total variance. Finally, like EOF2 with daily ozone data (Fig. 3d), EOF3 here displays a  
10 northeast-southwest pattern associated with enhanced 850 hPa meridional wind from the Gulf of  
11 Mexico (Fig. S3g and 3h). This EOF explains 11% of the total variance. The key difference  
12 between the two EOF analyses can be seen by comparing Fig. 3f and S3i: in the seasonal EOF  
13 analysis, the link between EOF3 and 850 hPa geopotential height is much weaker than what we  
14 find using daily ozone data. This weak relationship makes clear that the analysis using seasonal  
15 ozone data fails to identify the influence of Bermuda High west edge on ozone air quality. As we  
16 discuss in Sect. 6, the failure arises because the influence of the Bermuda High on ozone varies  
17 nonlinearly with the location of the Bermuda High west edge, and the monthly mean EOF  
18 analysis obscures this nonlinear relationship. Because the daily dataset provides a greater  
19 abundance of observations, the EOF analysis using these data can identify the fine structure of  
20 ozone variability.

21

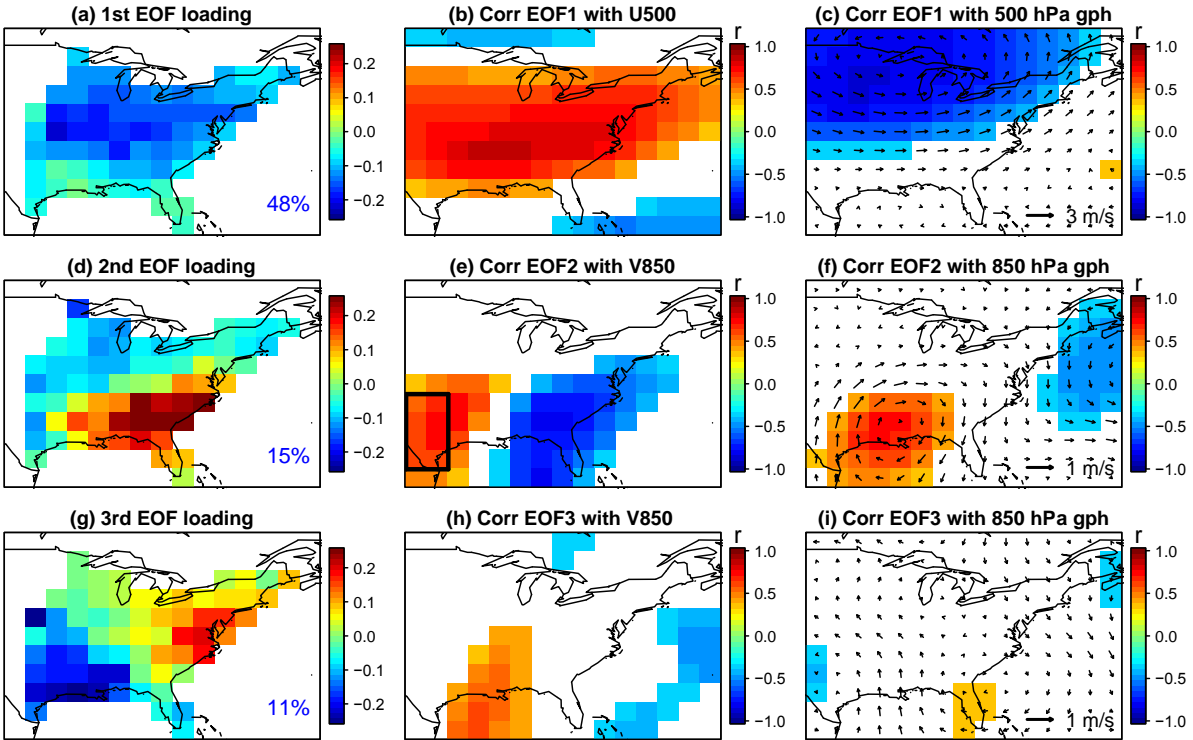

1  
 2 **Figure S3.** The top panels show (a) the spatial loadings of the first EOF pattern (EOF1) in JJA  
 3 mean surface MDA8 ozone over the United States from 1980 to 2012 and the correlations  $r$   
 4 between the principal components time series for the first mode (PC1) and (b) JJA mean 500 hPa  
 5 zonal wind speeds and (c) 500 hPa geopotential height. Composite 500 hPa wind anomalies  
 6 associated with positive PC1 are shown as black arrows in Panel (c). Panel (d) is same as (a), but  
 7 for the second EOF pattern (EOF2). Also shown are the correlations between PC2 and (e) JJA  
 8 mean 850 hPa meridional wind speed and (f) JJA mean 850 hPa geopotential height. The  
 9 composite 850 hPa wind anomalies with positive PC2 are shown as black arrows in Panel (f).  
 10 Panel (g) is same as (a), but for the third EOF pattern (EOF3). Correlations are shown between  
 11 PC3 and (h) 850 hPa meridional wind speeds and (i) 850 hPa geopotential heights. Panel (i) also  
 12 shows the composite 850 hPa wind anomalies associated with positive PC3 (black arrows).  
 13 White areas in all panels indicate either missing data or grid boxes where the correlation is not  
 14 significant at the 0.05 level.

15  
 16 **4 Definition of Bermuda High west edge**  
 17

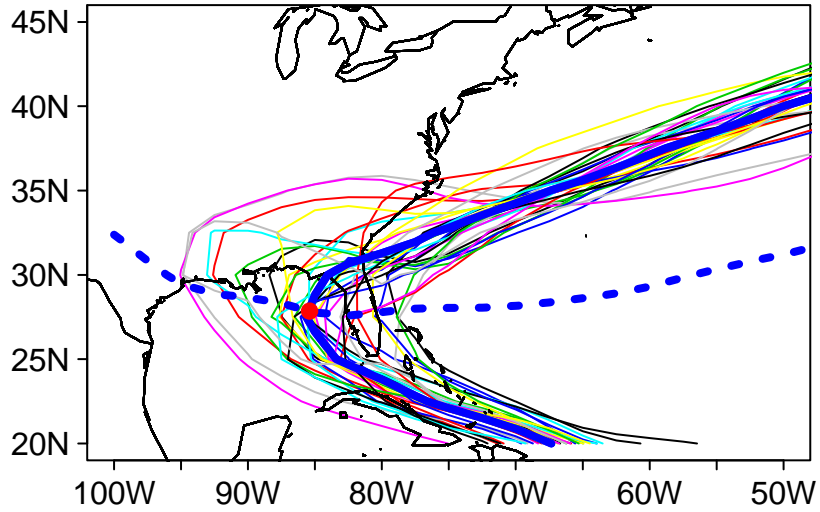

1  
 2 Figure S4. The definition of Bermuda High west edge. The bold blue solid curve denotes the  
 3 climatological 1560-gpm isoline in June-July-August (JJA) from 1980 to 2012. The dashed  
 4 curve line is the climatological  $u = 0 \text{ ms}^{-1}$  ridge line at 850 hPa for the same time period. The  
 5 intersection point, as denoted by the red points, is defined as the Bermuda High west edge, as in  
 6 Li et al. (2011). The thin solid curves represent the mean JJA 1560-gpm isolines in different  
 7 years from 1980 to 2012. The geopotential heights shown in this figure have been adjusted, as  
 8 described in Sect. 6.  
 9

1 5 Linear trend of sea level pressure (SLP) from 1980 to 2012

2

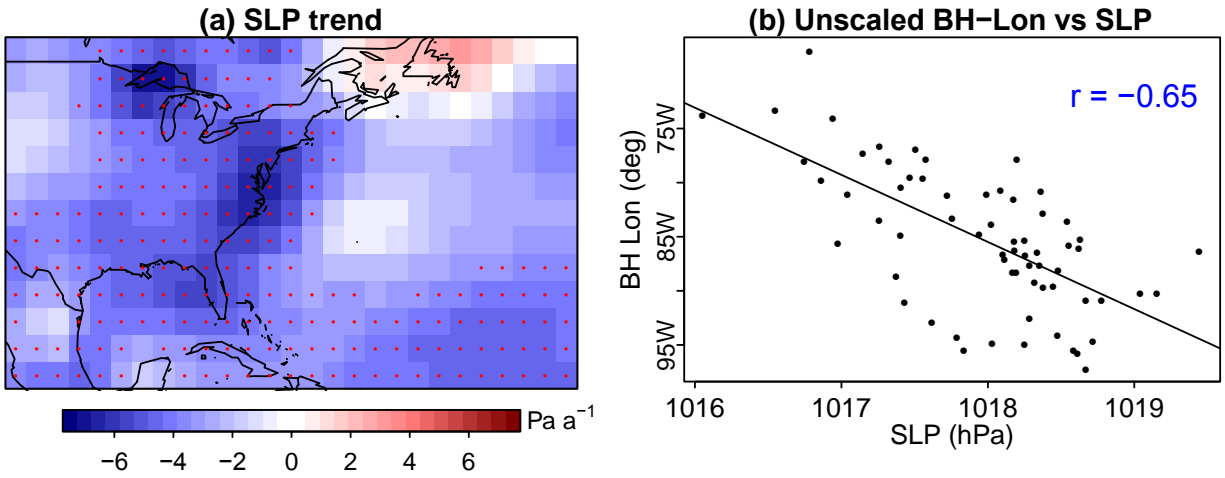

3

4 Figure S5. (a) The linear trend ( $\text{Pa a}^{-1}$ ) of mean JJA sea level pressure (SLP) over much of North  
5 America and the North Atlantic. Red dots indicate gridboxes where the trend is significant ( $p \leq$   
6 0.05). (b) Relationship of the longitude of the Bermuda High west edge (unscaled BH-Lon) as  
7 defined by Li et al. (2011) and mean JJA SLP averaged over the Bermuda High domain  
8 ( $100^\circ\text{W} \sim 40^\circ\text{W}$ ,  $20^\circ\text{N} \sim 40^\circ\text{N}$ ) during the 1948-2012 timeframe. Each point represents one  
9 summer. The correlation coefficient  $r$  is shown inset.

10



1 6 Variation of the standard deviation of BH-Lon as a function of the isoline of  
2 geopotential height

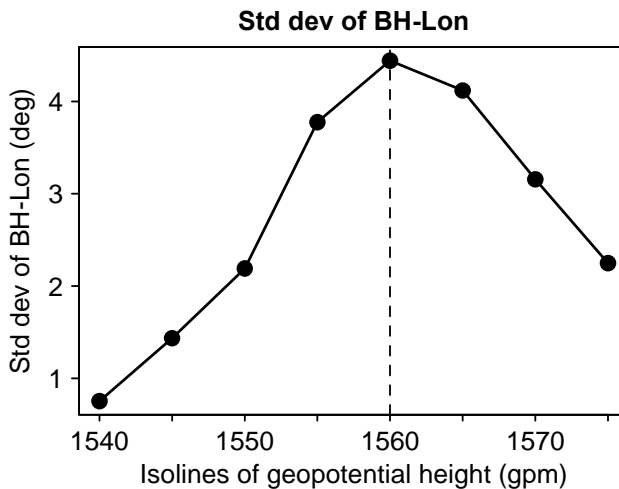

3  
4 Figure S6. Standard deviation over the 1980-2012 time period of the mean JJA longitudes of the  
5 Bermuda High west edge, as defined by different isolines of the geopotential height at 850 hPa.  
6 The plot shows BH-Lon adjusted for the uniform changes in geopotential height, as described in  
7 Sect. 6.

8

1 7 Correlation of ozone and locations of Bermuda High west edges

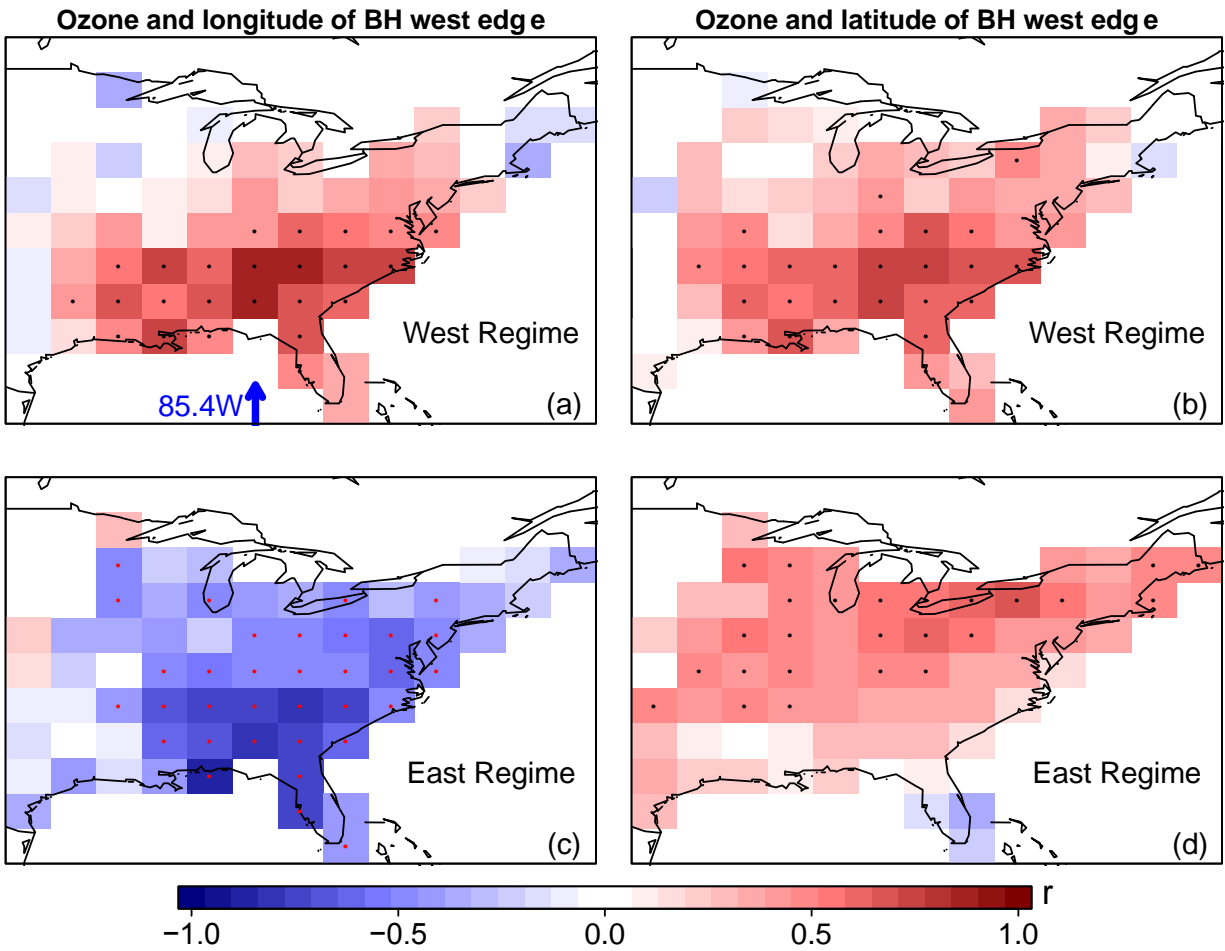

2  
 3 Figure S7. Correlations of the mean JJA MDA8 ozone in the eastern United States and the  
 4 location of the Bermuda High west edge over the 1980-2012 time period. Ozone concentrations  
 5 have been detrended as described in text. Positive values indicate increasing ozone with  
 6 westward or northward shift of the longitude of the Bermuda High west edge. The top panels (a  
 7 and b) show results for those summers when the west edge was located in the West Regime, with  
 8 the 1560-gpm crossing the 850 hPa wind ridge line west of 85.4°W. The bottom panels (c and d)  
 9 show results for the East Regime, when the 1560-gpm BH-Lon crossed the 850 hPa wind ridge  
 10 line east of 85.4°W. The location of 85.4°W is denoted by the blue arrow in Panel a. Red and  
 11 black dots indicate those gridboxes where the slope is significant at the 0.10 level. For more  
 12 details on the definition of the Bermuda High west edge for each regime, see text.
